# Supplementary material
Source: publisher figshare collection journal article supplement (https://f1000.figshare.com/ndownloader/files/1217785)
Supplement: Supplementary file 1 [file 1217785]

Gene:	Lmo4
Age:	P7
		CA1	%CA1	CA3	% CA3	DG	%DG
Control	1	56.42	97.45%	51.94	99.30%	40.27	96.46%
	2	73.36	126.71%	63.03	120.49%	52.55	125.87%
	3	79.39	137.11%	68.31	130.59%	57.35	137.38%
	4	33.43	57.73%	35.99	68.79%	27.44	65.74%
	5	30.52	52.71%	28.04	53.60%	21.7	51.98%
	6	48.43	83.65%	49.73	95.07%	32.03	76.71%
	7	83.74	144.63%	69.13	132.16%	60.89	145.87%
	Mean	57.9	100.00%	52.31	100.00%	41.75	100.00%
	SD	21.64	37.37%	15.9	30.39%	15.44	36.98%
	SEM	8.18	14.12%	6.01	11.49%	5.83	13.98%
Treated	1	42.02	72.58%	37.29	71.29%	31.33	75.05%
	2	79.57	137.43%	63.68	121.73%	61.46	147.21%
	3	52.96	91.47%	41.56	79.44%	36.67	87.84%
	4	38.78	66.98%	33.67	64.36%	26.33	63.06%
	5	46.95	81.09%	52.89	101.11%	42.14	100.94%
	6	58.09	100.33%	63.96	122.27%	44.92	107.60%
	7	54.54	94.20%	44.24	84.57%	39.75	95.21%
	Mean	53.27	92.01%	48.18	92.11%	40.37	96.70%
	SD	13.5	23.31%	12.25	23.41%	11.27	26.99%
	SEM	5.1	8.81%	4.63	8.85%	4.26	10.20%
Final values
		CA1	CA3	DG
	Ctrl	100	100	100
	Trt	92.01	92.11	96.7
	SEM Ctrl	14.12	11.49	13.98
	SEM Trt	8.81	8.85	10.2
